# Supplementary material
Source: Research Square preprint supplement (doi:10.21203/rs.3.rs-10174798/v1)
Supplement: Supplementary file 1 [file 354999c9c29c6765667f59b2.docx]

**Table 1: Rock Eval pyrolysis data of oil shale samples collected from the study area.**

| Site | Sample No. | S1  (mg/g) | S2  (mg/g) | S3  (mg/g) | Tmax (°C) | PI  (wt ratio) | HI (mg HC/g TOC) | OI  (mg CO2/g TOC) | TOC (%) |
| --- | --- | --- | --- | --- | --- | --- | --- | --- | --- |
| Wadi Kharaj  (WKH) | WKH1 | 1.65 | 99.05 | 0.64 | 421 | 0.02 | 734 | 5 | 13.50 |
| WKH2 | 2.74 | 107.14 | 0.77 | 415 | 0.02 | 765 | 6 | 14.00 |
| WKH3 | 2.13 | 71.16 | 0.69 | 417 | 0.03 | 678 | 7 | 10.50 |
| WKH4 | 3.29 | 111.17 | 0.5 | 416 | 0.03 | 564 | 3 | 19.70 |
| WKH5 | 2.32 | 89.01 | 0.69 | 420 | 0.03 | 664 | 5 | 13.40 |
| WKH6 | 1.1 | 36.06 | 0.54 | 419 | 0.03 | 541 | 8 | 6.66 |
| WKH7 | 2.97 | 116.94 | 0.52 | 419 | 0.02 | 806 | 4 | 14.50 |
| WKH8 | 2.84 | 122.97 | 0.76 | 421 | 0.02 | 773 | 5 | 15.90 |
| WKH9 | 1.97 | 93.7 | 0.71 | 419 | 0.02 | 744 | 6 | 12.60 |
| Al-Wehdah  (WWH) | WWH1 | 0.01 | 0.2 | 1.4 | 435 | 0.05 | 51 | 350 | 0.4 |
| WWH2 | 0.01 | 3.72 | 4.27 | 419 | 0.003 | 146 | 168 | 2.54 |
| WWH3 | 0.47 | 0.59 | 1.67 | 437 | 0.44 | 64 | 180 | 0.93 |
| WWH4 | 0.01 | 0.56 | 1.56 | 424 | 0.02 | 120 | 331 | 0.47 |
| WWH5 | 0.02 | 16.74 | 3.03 | 419 | 0.001 | 331 | 60 | 5.05 |
| WWH6 | 0.04 | 17.14 | 3.71 | 423 | 0.002 | 378 | 82 | 4.53 |
| WWH7 | 0.06 | 9.61 | 3.57 | 421 | 0.006 | 321 | 119 | 3 |
| WWH8 | 0.02 | 2.36 | 3.41 | 412 | 0.008 | 134 | 194 | 1.76 |
| WWH9 | 0.04 | 19.94 | 3.80 | 421 | 0.002 | 421 | 80 | 4.74 |
| WWH10 | 0.02 | 7.6 | 1.20 | 417 | 0.002 | 444 | 70 | 1.71 |
| WWH11 | 0.01 | 13.96 | 2.23 | 417 | 0.0007 | 464 | 74 | 3.01 |
| WWH12 | 0.05 | 10.27 | 2.37 | 423 | 0.005 | 355 | 82 | 2.89 |
| WWH13 | 0.04 | 12.39 | 3.90 | 423 | 0.003 | 381 | 120 | 3.25 |
| WWH14 | 0.02 | 11.93 | 2.00 | 419 | 0.002 | 466 | 78 | 2.56 |
| WWH15 | 0.41 | 0.55 | 1.66 | 434 | 0.43 | 59 | 180 | 0.92 |
