# Supplementary material
Source: Research Square preprint supplement (doi:10.21203/rs.3.rs-10174798/v1)
Supplement: Supplementary file 2 [file 3623ee215575e43fbef60b77.docx]

Table 2: The XRF analysis of the mineral matter from oil shale samples collected from Wadi Kharja.

| **Sample No.** | **CaO** | **SiO2** | **P2O5** | **Al2O3** | **SO3** | **Fe2O3** |
| --- | --- | --- | --- | --- | --- | --- |
| WKH**1** | **70.8** | **13.2** | **1.72** | **1.56** | **10.8** | **0.843** |
| WKH**2** | **72.7** | **11.4** | **1.63** | **1.77** | **10.7** | **0.734** |
| WKH**3** | **64.3** | **15** | **3.95** | **2.58** | **11.6** | **1.4** |
| WKH**4** | **66.3** | **13** | **3.39** | **3.15** | **11.1** | **1.65** |
| WKH**5** | **74.4** | **10.8** | **4.91** | **2.38** | **5.45** | **1.03** |
| WKH**6** | **71.1** | **6.02** | **5.6** | **1.89** | **13.6** | **0.731** |
| WKH**7** | **69.3** | **6.54** | **3.72** | **1.8** | **16.6** | **0.791** |
| WKH**8** | **67.8** | **7.3** | **9.41** | **1.95** | **12** | **0.583** |
| WKH**9** | **60.1** | **18.2** | **7.21** | **8.54** | **1.31** | **2.52** |
| **Min.** | **60.1** | **6.02** | **1.63** | **1.56** | **1.31** | **0.583** |
| **Max.** | **74.4** | **18.2** | **9.41** | **8.54** | **16.6** | **2.52** |
| **Average** | 68.53% | 5.42% | 3.42% | 2.84% | 10.35% | 1.14% |

Table 3: The XRF analysis of the mineral matter from oil shale samples collected from Al-Wehdah.

| Sample No. | CaO | SiO2 | P2O5 | Al2O3 | SO3 | Fe2O3 |
| --- | --- | --- | --- | --- | --- | --- |
| WWH1 | 81 | 13 | 1.69 | 1.78 | 0.494 | 1.34 |
| WWH2 | 67.5 | 26.5 | 1.11 | 1.45 | 1.13 | 1.58 |
| WWH3 | 73 | 19.3 | 1.26 | 1.41 | 2.82 | 1.3 |
| WWH4 | 89.8 | 6.46 | 0.421 | 1.16 | 0.761 | 0.758 |
| WWH5 | 63 | 27.7 | 0.604 | 1.81 | 4.13 | 1.89 |
| WWH6 | 64 | 27.8 | 1.26 | 1.2 | 4.02 | 0.93 |
| WWH7 | 55.7 | 39.3 | ND | 1.27 | 1.84 | 1.3 |
| WWH8 | 60.8 | 31.6 | 0.776 | 1.33 | 3.51 | 1.27 |
| WWH9 | 64 | 27.2 | 0.651 | 1.84 | 3.56 | 1.98 |
| WWH10 | 86 | 8.36 | 0.211 | 1.29 | 2.34 | 1.13 |
| WWH11 | 84.8 | 8.97 | 0.407 | 1.43 | 2.53 | 1.15 |
| WWH12 | 74.5 | 19.5 | 0.46 | 1.16 | 2.72 | 0.886 |
| WWH13 | 65.2 | 20.9 | 0.957 | 2.31 | 6.46 | 2.5 |
| WWH14 | 80.2 | 11.9 | 0.683 | 1.58 | 3.32 | 1.47 |
| WWH15 | 69.3 | 26.7 | 0.833 | 1.23 | 0.654 | 0.564 |
| Min. | 55.7 | 6.46 | 0.211 | 1.16 | 0.494 | 0.564 |
| Max. | 89.8 | 39.3 | 1.69 | 2.31 | 6.46 | 2.50 |
| Average | 71.92 | 21.01 | 0.809 | 1.483 | 2.686 | 1.338 |
